1 **Five years functional connectivity reorganization without clinical or cognitive decline in MS**

2

3 Einar August Høgestøl<sup>a, b</sup>, Samuele Ghezzi<sup>\*, c, d</sup>, Gro Owren Nygaard<sup>a</sup>, Thomas Espeseth<sup>e, f</sup>, Piotr Sowa<sup>g</sup>,  
4 Mona K. Beyer<sup>b, g</sup>, Hanne Flinstad Harbo<sup>a, b</sup>, Lars T. Westlye<sup>c, e, h</sup>, Hanneke E. Hulst<sup>d, i</sup>, Dag Alnæs<sup>c</sup>

5 <sup>a</sup> Oslo University Hospital, Department of Neurology, Oslo, Norway

6 <sup>b</sup> University of Oslo, Institute of Clinical Medicine, Oslo, Norway

7 <sup>c</sup> NORMENT, Division of Mental Health and Addiction, Oslo, Norway

8 <sup>d</sup> Vrije Universiteit Amsterdam, Department of Neuroscience, Amsterdam, The Netherlands

9 <sup>e</sup> University of Oslo, Department of Psychology, Oslo, Norway

10 <sup>f</sup> Bjørknes College, Oslo, Norway

11 <sup>g</sup> Oslo University Hospital, Division of Radiology and Nuclear Medicine, Oslo, Norway

12 <sup>h</sup> University of Oslo, KG Jebsen Centre for Neurodevelopmental Disorders, Oslo, Norway

13 <sup>i</sup> Amsterdam UMC, Amsterdam Neuroscience, Department of Anatomy and Neurosciences, MS Center  
14 Amsterdam, Amsterdam, The Netherlands

15

16 \* Einar August Høgestøl and Samuele Ghezzi contributed equally to this work as first authors.

17

18 **Keywords:** multiple sclerosis, functional neuroimaging, fMRI, cohort studies, all  
19 neuropsychological/behaviour

20 **Corresponding author:**

21 Einar August Høgestøl

22 Department of Neurology, Neuroscience Research Unit, Multiple Sclerosis Research Group University of

23 Oslo & Oslo University Hospital

24 Domus Medica 4, room L-268, Gaustadalleén 34

25 0372 Oslo, Norway

26 E-mail: [einar.august@gmail.com](mailto:einar.august@gmail.com)

27 Mobile: +47 41 10 89 81

28

29 Characters in title: 93 (Max 96)

30 Abstract: 249 (Max 250)

31 Introduction: 250 (Max 250)

32 Main text: 4269 (Max 4500)

33 References: 44 (Max 50)

34 Items: 7 (Max 7)

35 **ABSTRACT**

36 **Objective:** 1) To assess fMRI-based functional connectivity (FC) anomalies in early multiple sclerosis  
37 (MS), 2) To determine the relation between FC changes and structural brain damage due to disease  
38 progression 3) To study the association between FC changes and cognitive and physical disability.

39 **Methods:** Structural MRI and resting-state fMRI were acquired from 76 early relapsing-remitting MS  
40 patients at baseline (average disease duration 71.7 months  $\pm$  63) and after five years. Ninety-four  
41 healthy controls (HCs) matched for age and sex were included at baseline. Independent component  
42 analysis (ICA) and network modelling were used to measure FC. FC variation was related to  
43 expanded disability status scale and neuropsychological outcomes. Brain and lesion volumes were  
44 quantified using standard methods. We used the 25 independent components obtained from ICA to  
45 estimate the longitudinal stability of the brain connectome as a proxy for functional reorganization  
46 over time.

47 **Results:** The MS subjects were clinically and cognitively stable. Compared to HCs, FC abnormalities  
48 were detected within networks and in single connections in patients with early MS at baseline. Over  
49 time, FC was relatively invariable, but changes in FC were associated with progression of brain  
50 atrophy ( $p = 0.39$ ,  $p = .06$ ). No significant relationship with clinical and cognitive measures or lesion  
51 load was detected.

52 **Conclusion:** Patients with MS showed evidence of altered FC in the early stages of the disease. Over  
53 time, changes in FC seem to be related to a progression of brain atrophy, which are known to  
54 precede changes in clinical and cognitive functioning.

## 55 INTRODUCTION

56 Multiple sclerosis (MS) is a disease characterized radiologically by the accumulation of lesions in grey  
57 and white matter over time throughout the CNS<sup>1, 2</sup>. Brain white matter constitutes the structural  
58 connectivity backbone supporting large-scale brain functional network connectivity<sup>3, 4</sup>. Accumulating  
59 evidence has demonstrated abnormal patterns of brain functional connectivity (FC) in MS patients as  
60 compared to healthy controls (HCs)<sup>5-12</sup>. Extensive evidence shows that FC abnormalities are  
61 associated with clinical disability in MS<sup>5, 6, 8-10, 12</sup>, with a complex pattern of the directionality of FC  
62 effects<sup>13</sup>. A longitudinal approach that accounts for all alterations in FC following structural damage  
63 in MS is warranted to better understand the complex interplay between disease progression and FC  
64 reorganization<sup>13</sup>.

65 We investigated a prospectively collected MS cohort with comprehensive imaging and  
66 clinical data at two time points over five years. First, we explored the baseline resting-state (rs) fMRI  
67 MS-data and compared this to a group of age-matched HCs from the same scanner. Then, we used  
68 rs-fMRI data to compute the longitudinal stability of each patients' brain functional connectome<sup>14</sup>,  
69 reducing the complex dynamics of the functional connectome into a single, individual-level global  
70 marker of longitudinal network reorganization. The resulting rs-fMRI global measure of connectome  
71 stability was compared to brain atrophy, lesion load and clinical and cognitive outcomes. Our  
72 hypotheses were 1) MS affects FC in early stages of disease, 2) disease progression is associated with  
73 FC reorganization over a five-year interval and 3) an individual-level global measure of connectome  
74 stability is associated with clinical trajectories in MS.

## 75 METHODS

### 76 Participants

77 We included 76 MS patients from a prospective longitudinal study at Oslo University Hospital<sup>15-17</sup>. All  
78 patients were diagnosed between January 2009 and October 2012 with relapsing-remitting MS  
79 (RRMS) according to the revised McDonald Criteria<sup>18</sup>. One patient originally categorized as RRMS

80 was later re-evaluated to be primary-progressive (PP) MS, although with relapses and MRI activity.  
81 The patient was excluded from image analysis due to missing rs-fMRI data. Early MS was defined as  
82 within the first 10 years of MS symptoms onset. Six participants were not examined with the rs-fMRI  
83 sequence at baseline, resulting in 70 patients eligible for the image analyses. All participants were  
84 invited for follow-up, five years after the first time point. At follow-up, 62 patients were assessed,  
85 with two patients missing the rs-fMRI sequence. Inclusion criteria included age between 18 and 50  
86 years, < 3 years since diagnosis of RRMS at baseline,  $\geq 6$  weeks since the last relapse or corticoid  
87 treatment, fluency in Norwegian language, right handedness, no prior neurological or psychiatric  
88 disease, no head injury and no substance abuse. We excluded pregnant or breastfeeding patients  
89 and a patient with a previous adverse reaction to gadolinium injection.

90 Cross-sectional data from HC (n=94, age- and sex-matched with respect to the patient  
91 sample) were sampled from the Norwegian Cognitive NeuroGenetics (NCNG) cohort, recruited  
92 through newspaper advertisements in the Oslo area<sup>19</sup>. Inclusion criteria were age between 20 and  
93 80 years, no previous diseases affecting the CNS and no previous or current substance abuse.

#### 94 **Neurological assessment**

95 All MS patients completed a comprehensive neurological examination at baseline and follow-up,  
96 including assessment of the expanded disability status scale (EDSS) within the same week as the MRI  
97 scan. Physical ability of MS patients was assessed using the Timed 25-Foot Walk (T25-FW) and the 9-  
98 hole peg test. No evidence of disease activity (NEDA) -3 was defined as the absence of clinical  
99 relapses, new or enlarging MRI lesions and clinical progression as measured by EDSS. First line  
100 treatment included interferons, glatiramer acetate, teriflunomide and dimethyl fumarate, while  
101 second line treatment included fingolimod, natalizumab and alemtuzumab.

102 Furthermore, all subjects completed a fatigue self-report questionnaire (FSS)<sup>20</sup> and  
103 underwent cognitive evaluation. FSS mean scores of  $\geq 5$  were defined as clinically significant  
104 fatigue<sup>21</sup>. The cognitive evaluation included tests for processing speed, executive functioning,

105 visuospatial and verbal memory (see Supplemental). In order to obtain a measure of average  
106 cognition we first calculated Z-scores for each of the tests administered. Then, we averaged Z-scores  
107 within the four cognitive domains previously described, and eventually we averaged the scores  
108 across domains, obtaining a measure of overall cognition for each of the MS patients at both time  
109 points. Similarly, we averaged the Z-scores for T25-FW and 9-hole peg test to obtain a measure of  
110 physical ability.

111 Cross-sectional California Verbal Learning Test-II (CVLT-II) and colour-word interference test  
112 (CWIT) data from the NCNG HC sample and summary statistics for the remaining tests obtained from  
113 an Amsterdam HC sample<sup>22</sup> were used for comparison with the patient group. We considered an  
114 annual decline of 0.25 SD in average cognition and physical performance as significant<sup>22</sup>.

### 115 **MRI acquisition and structural MRI pre- and post-processing**

116 All MS and HC subjects were scanned using the same 1.5 T scanner (Avanto, Siemens Medical  
117 Solutions; Erlangen, Germany) equipped with a 12-channel head coil. For rs-fMRI we used a T2\*  
118 weighted echo-planar imaging (EPI) sequence (repetition time (TR)=3000 milliseconds (ms), echo  
119 time (TE)=70 ms, flip angle (FA)=90°, voxel size=3.44x3.44x4 mm, field-of-view (FOV)=220,  
120 descending acquisition, GeneRalized Auto calibrating Partial Acquisition (GRAPPA) acceleration  
121 factor=2), 28 transversally oriented slices, no gap, with a scan time of 7 minutes and 30 seconds. The  
122 rs-fMRI at baseline included 150 volumes, while the follow-up rs-fMRI scan yielded 100 volumes. The  
123 rs-fMRI scan for the HCs constituted of 300 volumes. For fMRI pre-processing and analyses we  
124 restricted the rs-fMRI data to the first 100 volumes for all participants. Three dummy volumes were  
125 collected to avoid T1 saturation effects. Structural MRI data were collected using a 3D T1-weighted  
126 Magnetization Prepared Rapid Gradient Echo (MP-RAGE) sequence (TR=2400 ms, TE=3.61 ms, time  
127 to inversion=1000 ms, FA=8°, matrix 192x192, field of view=240, scan time 7 minutes and 42  
128 seconds, sagittal slices=160, voxel size =1.20x1.25x1.25 mm). FLAIR sequence parameters were  
129 TR=6000 ms, TE=3.33 ms, time to inversion=2200 ms, FOV=260, FA=variable T2, matrix 256 × 204.

130 Each scan lasted 7 minutes and 2 seconds, sagittal slices=176 slices, slice thickness=1 mm, voxel size  
131 1.0x1.0x1.0.

132

133 We performed cortical reconstruction by using the T1-weighted scans and volumetric  
134 segmentation with FreeSurfer 5.3 (<http://surfer.nmr.mgh.harvard.edu/>)<sup>23</sup>. To extract reliable volume  
135 and thickness estimates, images included in the longitudinal MS MRI dataset were processed with  
136 the longitudinal stream in FreeSurfer<sup>24</sup>. To further validate the brain volume measure, we studied its  
137 association with lesion-filled masks at baseline (see table e-1 in Supplemental data). Lesion volume  
138 was based on LesionQuant output<sup>25, 26</sup>. To validate the lesion output by LesionQuant we additionally  
139 assessed its association with lesion masks previously acquired using Cascade and validated by an  
140 experienced neuroradiologist at baseline<sup>27</sup> (see table e-1 in Supplemental data).

#### 141 **fMRI pre-processing**

142 fMRI was performed using FMRI Expert Analysis Tool (FEAT) Version 6.00, from FMRIB's Software  
143 Library (<https://fsl.fmrib.ox.ac.uk/>)<sup>28</sup>. Head motion was corrected using MCFLIRT<sup>29</sup> before linear  
144 trends and low-frequency drifts were removed (high-pass filter of 0.01 Hertz). fMRI images were  
145 carefully examined by trained research personnel for image artefacts, such as head motion and  
146 missing coverage of the scan window. In total, fMRI scans from ten patients and 13 HCs at baseline  
147 and eight patients at follow-up were discarded due to incomplete coverage of the visual and parietal  
148 cortex. Scans in which the mean relative motion parameter (defined as the average of the  
149 translational motion for each scan relative to the previous scan) exceeded 2.5 SD from the average  
150 of all runs (across scans) were discarded (none in our MS sample). Brain extraction tool<sup>30</sup> was used to  
151 remove non-brain tissue. Spatial smoothing was performed using a Gaussian kernel filter with a full  
152 width at half maximum (FWHM) of 6 mm<sup>31</sup>. FMRIB's Nonlinear Image Registration tool (FNIRT) was  
153 used to register the participants fMRI volumes to Montreal Neurological Institute (MNI) 152  
154 standard using the T1-weighted scan as an intermediate, which had the non-brain tissue removed

155 using procedures for automated volumetric segmentation in Freesurfer 5.3

156 (<http://surfer.nmr.mgh.harvard.edu/>)<sup>23</sup>.

157 Single-session independent component analysis (ICA) was performed for all runs using  
158 Multivariate Exploratory Linear Optimized Decomposition into Independent Components  
159 (MELODIC)<sup>32</sup>. We used FIX<sup>33</sup> for automatic classification of the single-session ICA into signal and noise  
160 components, in order to regress noise components from fMRI data. Data cleaning also included  
161 correction based on the estimated motion parameters for each run, using linear regression. These  
162 ICA-based procedures for denoising of fMRI-data efficiently reduce motion induced variability,  
163 outperforming methods based on regression of motion parameters, scrubbing or de-spiking<sup>34</sup>.

#### 164 **ICA and functional connectivity matrices**

165 The cleaned and MNI-conformed rs-fMRI datasets were submitted to temporal concatenation group  
166 independent component analysis (gICA) using MELODIC<sup>32</sup> with a model order of 40. These group  
167 level spatial components were then used as spatial repressors against the original rs-fMRI datasets  
168 to estimate subject-specific components and associated time series (dual regression)<sup>35</sup>. After  
169 removing 15 ICs that originated in non-CNS areas and therefore were classified as noise components  
170 by a careful evaluation, we extracted a total of 25 ICs for further analysis. The times series of the  
171 noise-ICs were regressed out of the time series of the kept ICs. We then calculated connectivity  
172 matrices using full as well as regularized partial correlations with automatic estimation of  
173 regularization parameters at the individual level<sup>36, 37</sup>. Based on the Euclidean distances of the full  
174 temporal correlations, the ICs grouped into four clusters largely representing (1) and (2) default  
175 mode network (DMN) and frontoparietal areas, (3) auditory network and (4) sensory/motor areas  
176 (figure 1). For detailed information regarding the specific ICs or the anatomical constitution of the  
177 networks, please refer to [table e-2 in Supplemental Data](#). Finally, since partial correlations are  
178 assumed to represent direct connections between nodes, these were used in further analyses of  
179 case-control differences and connectome stability.

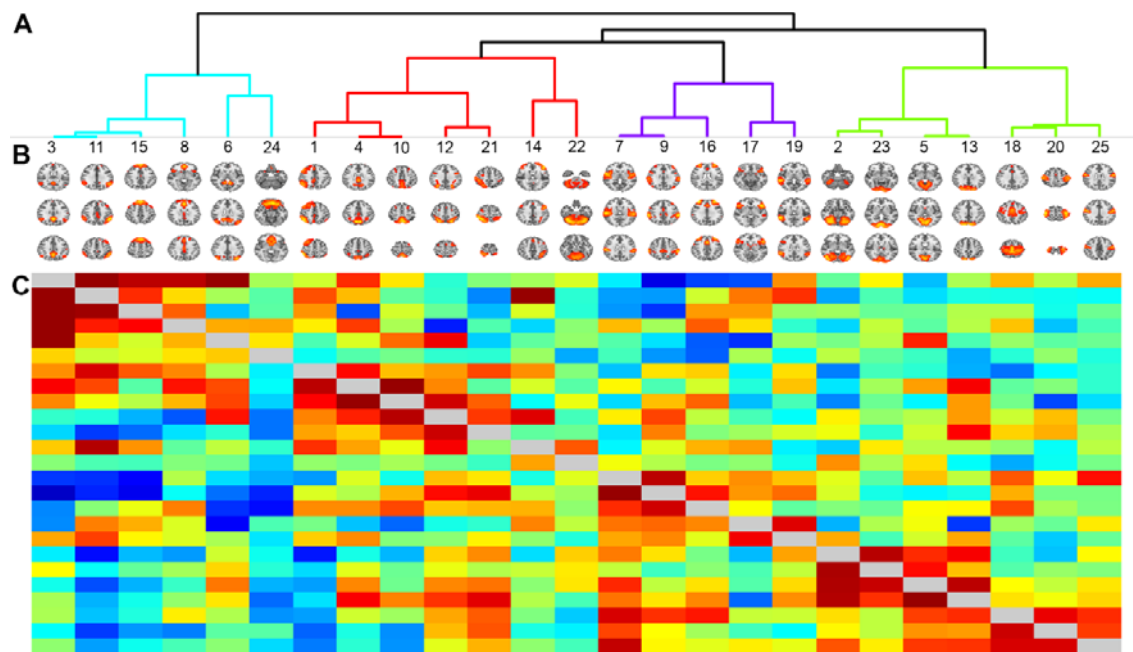

180

181 **Figure 1** Hierarchical clustering of brain nodes. (A) Dendrogram showing the clustering of the nodes,  
182 based on the full correlations across conditions and participants. The colours of the dendrograms  
183 represent the four ICA clusters (1), (2), (3) and (4), from left to right. (B) The 25 ICs from group ICA  
184 used in the analyses. (C) The full correlation matrix across conditions and participants is shown  
185 below the diagonal. Regularized partial correlation across conditions are presented above the  
186 diagonal. Warm colours indicate positive correlations, cold colours negative correlations.

187

### 188 **Connectome stability**

189 We computed the stability of the brain functional connectome for each MS patient as a proxy for FC  
190 reorganization. We vectorized each participant's whole-brain connectivity matrix, creating a vector  
191 of size 1 x 300 (25 ICs and 300 unique links between them). Then, we calculated the within subjects  
192 Spearman correlation coefficient between fMRI at baseline and follow-up, in this way obtaining a  
193 measure of whole-brain connectome stability<sup>14</sup>. Similarly, we computed the within-network  
194 connectome stability for each of the four clusters previously identified. Alterations in the rank of  
195 edges across the connectome between baseline and follow-up, independent of their direction, will



196 be reflected in the connectome stability, providing an individual global and network-specific  
197 measure of FC reorganization for the MS patients. To further validate the implementation of the  
198 stability of the brain functional connectome as a measure that accounts for all changes in FC over  
199 time, we correlated connectome stability with the sum of the squared differences in FC between  
200 baseline and FU for all edges in each of the MS patients.

## 201 **Statistical analysis**

202 For statistical analyses, we used R<sup>38</sup> and MATLAB version 2014a (The MathWorks Inc., Natick, MA,  
203 2018). The changes in performance for all cognitive and clinical tests between baseline and follow-  
204 up were measured by paired sample t-tests.

205 We used separate multivariate linear models to test for differences in whole brain FC, within  
206 network FC, and FC at the level of single edges between HCs and MS patients at baseline. We  
207 performed paired sample t-tests to assess changes in FC over time in the MS cohort.

208 To investigate whether disease progression was associated with functional reorganization,  
209 we used separate multivariate linear models to compare whole brain, and within network,  
210 connectome stability between patients that showed evidence of disease activity (EDA) and patients  
211 with NEDA. To further test the hypothesis that structural damage due to disease progression is  
212 associated with a reduction in the stability of the functional connectome we correlated whole brain  
213 functional connectome stability of EDA patients with measures of brain volume loss and  
214 accumulation of lesion load over five years. For lesion volumes we used log transformation, plus a  
215 constant  $k = 2$ , to account for the lack of normal distribution in the resulting volumes.

216 Finally, we used multivariate linear models to assess the relationship between connectome  
217 stability with cognition and physical ability at follow-up, and on the change in these tests between  
218 baseline and follow-up.

219 We adjusted for sex, age, mean relative motion and signal to noise ratio in all linear models.  
220 Significance was defined as  $p < .05$  in all the performed tests. In the first part of the study, when we

221 compared FC between HCs and MS patients and later investigated changes in FC over time in the MS  
222 cohort, we corrected p value for multiple testing by false discovery rate. Due to the limited sample  
223 size of the subgroups, we used permutation testing to correct p value for multiple testing in the  
224 comparisons of connectome stability between EDA and NEDA patients. Specifically, we obtained an  
225 empirical null-distribution of estimates for the group difference across 1000 permutations randomly  
226 permuting the group-label. The family wise error was controlled by collecting the maximum test  
227 statistic across the whole brain and within-network tests for each permutation<sup>39</sup>. The resulting p  
228 value was calculated by dividing the number of permuted beta-values equal or larger than the point  
229 estimate by the total number of permutations.

### 230 **Standard protocols approval, registrations, and patient consents**

231 The project was approved by the regional ethical committee of South Eastern Norway (REC ID:  
232 2011/1846, 2016/102 and 2009/2070), and all participants received oral and written information  
233 and gave their written informed consent.

### 234 **Data availability**

235 Summary data as published in this paper will be available, but other data are not publicly available  
236 because of patient privacy restrictions decided by the Regional Ethical Committee. We may apply for  
237 permission to share data with new collaborators, still adhering to patient privacy requirements of  
238 the “Law of Health Research”. All code needed to replicate our described analyses is available upon  
239 request from the corresponding author.

## 240 **RESULTS**

### 241 **Sample characteristics at baseline and follow-up**

242 Our MS sample included 71% (N=54) females, in line with the prevalence of MS in the general  
243 population. At follow-up 44% (N=27) of the patients met criteria for NEDA-3. The median EDSS (2.0)  
244 score did not change after five years. Only one patient developed secondary progressive MS (SPMS)  
245 at follow-up. Mean time between baseline and follow-up was 4.5 years (SD = 0.4 years, range = 3.7-

246 5.4 years). Disease modifying treatment (DMT) were used by 78% and 69% of the patients at  
247 baseline and follow-up, respectively (table 1). The proportion of patients using second line  
248 treatment increased from 13% at baseline to 32% at follow-up. HCs were matched to the MS sample  
249 at baseline by age (HC mean years = 34.89, SD = 9.17) and sex (74% of HC were female). 70% of HCs  
250 from the Amsterdam sample were females, (mean age years = 41.86, SD = 11.44).

**Table 1** Demographic and clinical characteristics of the multiple sclerosis patients

|                                                 | Baseline       | Follow-up      |
|-------------------------------------------------|----------------|----------------|
| <b>(a) Demographic characteristics</b>          | n=76           | n= 62          |
| Female, n (%)                                   | 54 (71)        | 44 (71)        |
| Age, mean years (SD)                            | 35.3 (7.3)     | 40.5 (7.2)     |
| Disease duration, mean months (SD)              | 71.7 (63)      | 125.1 (60.2)   |
| Age at first symptom, mean years (SD)           | 29.3 (6.7)     |                |
| Months since diagnosis, mean (SD)               | 14.0 (11.9)    | 66.4 (14.5)    |
| <b><i>Disease modifying treatment</i></b>       |                |                |
| None, n (%)                                     | 17 (22)        | 19 (31)        |
| First line treatment, n (%)                     | 49 (65)        | 23 (37)        |
| Second line treatment, n (%)                    | 10 (13)        | 20 (32)        |
| <b>(b) Clinical evaluation</b>                  |                |                |
| <b><i>Multiple sclerosis classification</i></b> |                |                |
| RRMS, n (%)                                     | 75 (99)        | 60 (96)        |
| PPMS, n (%)                                     | 1 (1)          | 1 (2)          |
| SPMS, n (%)                                     |                | 1 (2)          |
| <b><i>Neurological disability</i></b>           |                |                |
| EDSS, median (SD, range)                        | 2.0 (0.9, 0-6) | 2.0 (1.3, 0-6) |
| MSSS (SD)                                       | 4.9 (1.9)      | 2.6 (1.8)      |
| Number of total relapses, mean (SD)             | 1.8 (1)        | 2.6 (1.3)      |

---

|                |           |            |
|----------------|-----------|------------|
| FSS, mean (SD) | 4.2 (1.7) | 4.13 (1.9) |
|----------------|-----------|------------|

---

**(c) NEDA assessment**

---

|               |         |
|---------------|---------|
| NEDA-3, n (%) | 27 (44) |
|---------------|---------|

---

OCB, oligoclonal bands; RRMS, relapsing-remitting multiple sclerosis; PPMS, primary-progressive multiple sclerosis; SPMS, secondary-progressive multiple sclerosis; EDSS, expanded disability status scale; MSSS, multiple sclerosis severity scale; FSS, fatigue severity scale; NEDA, no evidence of disease activity.

251

252           The performance of MS patients on all cognitive tests of the CWIT, in addition to the CVLT-II,  
253 improved over time ([table e-3 in Supplemental Data](#)). The performance in symbol digit modalities  
254 test, that also was used to investigate processing speed, did not change over time ([table e-3 in](#)  
255 [Supplemental Data](#)). Both T25-FT and 9-hole peg test at follow-up did not show any significant  
256 development when compared to baseline ([table e-3 in Supplemental Data](#)).

257           We found no effects of motion parameters such as signal to noise ratio and mean relative  
258 motion with clinical and cognitive outcomes ([table e-4 in Supplemental Data](#)).

259 **Functional connectivity abnormalities in MS versus HCs at baseline**

260 Overall FC, for the complete combined functional connectome, was lower in MS patients compared  
261 to HCs. FC within three of the four large-scale networks investigated was significantly decreased in  
262 MS patients. After correction for multiple testing only network 1 and 2 remained significantly  
263 different from controls ([table 2](#)). Edge wise analysis showed that a connection (IC11-IC15) in network  
264 1 was weaker in MS relative to controls ( $\beta = -0.1$ ,  $t(135) = -5.21$ ,  $p = .0002$ ), while another (IC6-IC11)  
265 one was stronger in patients compared to HCs ( $\beta = 0.07$ ,  $t(135) = 3.54$ ,  $p = .032$ ). An edge (IC10-IC14)  
266 in network 2 was increased in MS ( $\beta = 0.08$ ,  $t(135) = 3.74$ ,  $p = .002$ ) and within network 3 one  
267 connection (IC7-IC16) decreased intensity in patients relative to controls ( $\beta = -0.08$ ,  $t(135) = -3.94$ ,  $p$   
268  $= .001$ ). Also, a connection (IC2-IC7) between networks 3 and 4 was altered in MS patients ( $\beta = -$   
269  $0.08$ ,  $t(135) = -4.02$ ,  $p = .001$ ). [Figure 2](#) lists the comparisons in FC between MS and HCs at the level

270 of single connections, showing that FC abnormalities are bidirectional in MS ([figure e-1 in](#)  
271 [Supplemental data for complete p values](#)).

272 FC did not change significantly over time in the MS cohort, as measured by paired sample t-  
273 test between all ICs considered singularly, and between ICs grouped into networks, across time  
274 ([figure e-2, e-3 and table e-5 in Supplemental Data](#)). Additional analysis including careful lesion  
275 masking during the estimation of the node time series did not change the main effects or  
276 interpretation of the results ([figure e-4 in Supplemental Data](#)).

277

---

**Table 2** Within network functional connectivity abnormalities in MS

|                              | <b>Beta coefficient</b> | <b>T value</b> | <b>Standard deviation</b> | <b>P value</b> |
|------------------------------|-------------------------|----------------|---------------------------|----------------|
| <b>Full brain</b>            | -0.001                  | -1.28          | 0.001                     | 0.2            |
| <b>Network 1</b>             | -0.017                  | -3.56          | 0.005                     | 0.002 *        |
| DMN and frontoparietal nodes |                         |                |                           |                |
| <b>Network 2</b>             | -0.011                  | -3.14          | 0.003                     | 0.004 *        |
| DMN and frontoparietal nodes |                         |                |                           |                |
| <b>Network 3</b>             | -0.009                  | -1.59          | 0.006                     | 0.15           |
| Auditory nodes               |                         |                |                           |                |
| <b>Network 4</b>             | 0.002                   | 0.41           | 0.005                     | 0.68           |
| Sensory and motor nodes      |                         |                |                           |                |

---

Results of multivariate linear regression models corrected for sex, age, mean relative motion and signal to noise ratio. P values corrected for multiple testing

by false discovery rate. \* P value significant after correction for multiple testing by false discovery rate

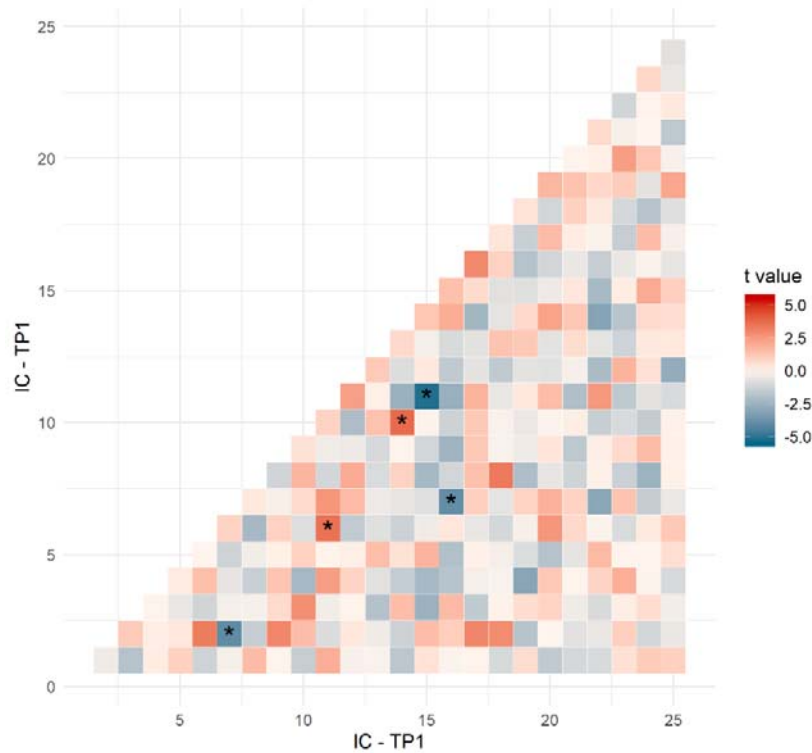

278

279 **Figure 2** Edgewise analysis of functional connectivity abnormalities in MS vs HCs. T values form  
280 multivariate linear regressions assessing differences in FC at the level of single connections between  
281 MS and HCs. Warm colours indicate increased FC in MS, cold colours a decrease in FC. \* P value  
282 significant after correction for multiple testing by false discovery rate.

283

#### 284 **Connectome stability over time**

285 The stability of the brain functional connectome in the whole MS cohort, and in the EDA and NEDA  
286 subgroups are depicted in Figure 3, enabling visualization of FC reorganization. Connectome stability  
287 of network 2 was lower in EDA patients compared to NEDA patients ( $\beta = 0.14$ ,  $t(34) = 2.26$ ,  $p = .03$ ),  
288 but did not survive correction for multiple testing (table e-6 in Supplemental Data).

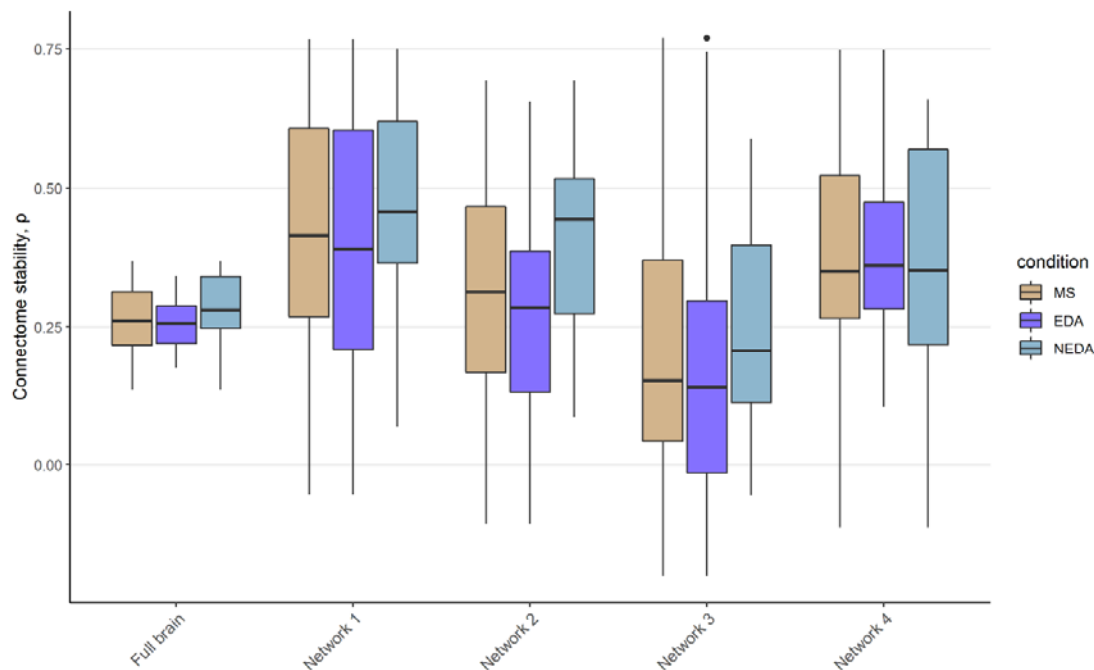

289

290 **Figure 3** Stability of the brain functional connectome between baseline and follow-up for the MS  
291 sample as a whole, and for the subgroups of EDA and NEDA, respectively for the global estimate and  
292 all resulting networks. We found a trend where patients in the EDA subgroup compared to both  
293 patients with NEDA and HC patients had improved connectome stability.

294

295 The analyses revealed a borderline significant association between connectome stability and change  
296 in brain volume between baseline and follow-up, indicating that the larger changes in FC were  
297 associated with increased brain volume loss over time, but no significant association was detected  
298 with the accumulation of lesion volume over time (figure 4). We also checked for apparent relations  
299 between motion parameters such as signal to noise ratio and mean relative motion and brain  
300 atrophy and accumulation of lesion load, but we did not find any (table e-7 in Supplemental Data).

301

302 We correlated the stability of the brain functional connectome with the sum of the squared  
303 differences in FC between baseline and FU, and we found that these two indices were highly related  
( $\rho = -0.59$ ,  $p < .0001$ ).

304

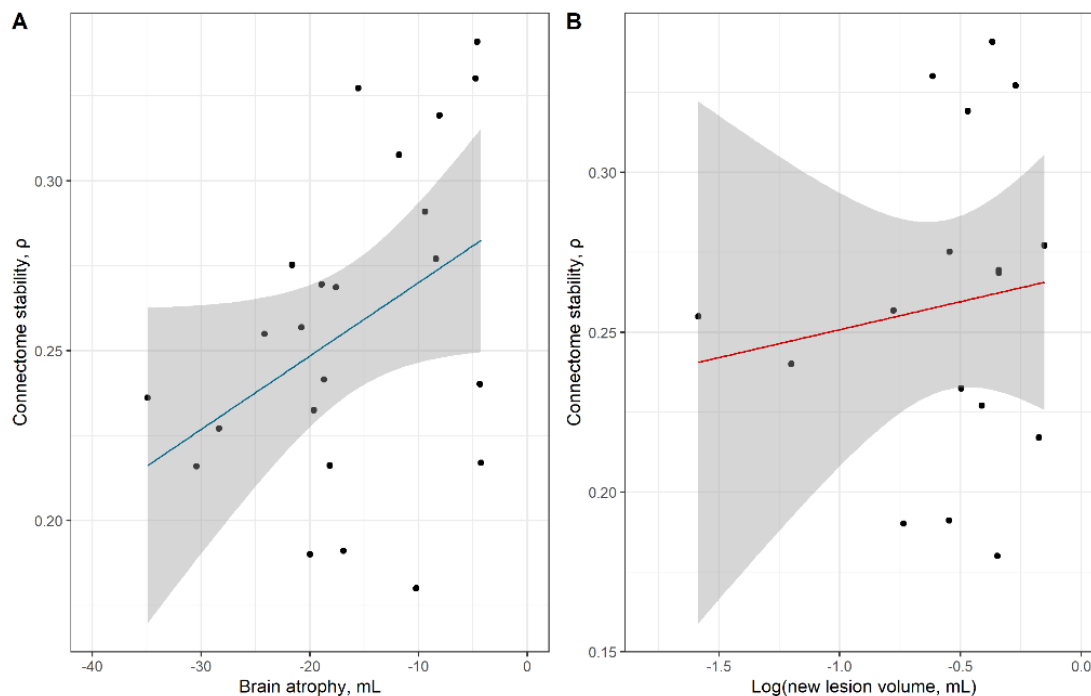

305

306 **Figure 4** Correlation between structural damage and stability of the brain functional connectome.

307 (A) correlation between brain atrophy and the rate of FC reorganization,  $\rho = 0.40$ ,  $p = .06$ . (B)

308 correlation between accumulation of lesion volume over time and the rate of FC reorganization,  $\rho =$

309  $0.13$ ,  $p = .63$ .

310

### 311 **Clinical relevance of functional connectivity changes**

312 Finally, we explored the effects of the changes in FC on cognitive performance and physical ability

313 using separate general linear models with average cognition and physical ability at FU as dependent

314 variables, covarying for age, sex, signal to noise ratio and mean relative motion. Younger age at FU

315 ( $\beta = -0.03$ ,  $t(34) = -2.08$ ,  $p = .045$ ) was associated with better cognitive performance at FU (figure 5A).

316 Neither stability of the brain functional connectome, age, sex, signal to noise ratio nor mean relative

317 motion were associated with longitudinal changes in cognitive performance ( $p > .05$ ) (figure 5B).



318 For physical ability, lower connectome stability ( $\beta = 4.56$ ,  $t(34) = 2.00$ ,  $p = .05$ ), higher age at  
319 FU ( $\beta = -0.05$ ,  $t(34) = -2.45$ ,  $p = .02$ ) and sex, with women scoring better than men, ( $\beta = 0.70$ ,  $t(34) =$   
320  $2.46$ ,  $p = .02$ ) were associated with decreased physical ability at FU (figure 5C). None of the  
321 investigated variables were associated with changes in physical performance over time ( $p > .05$ )  
322 (figure 5D).

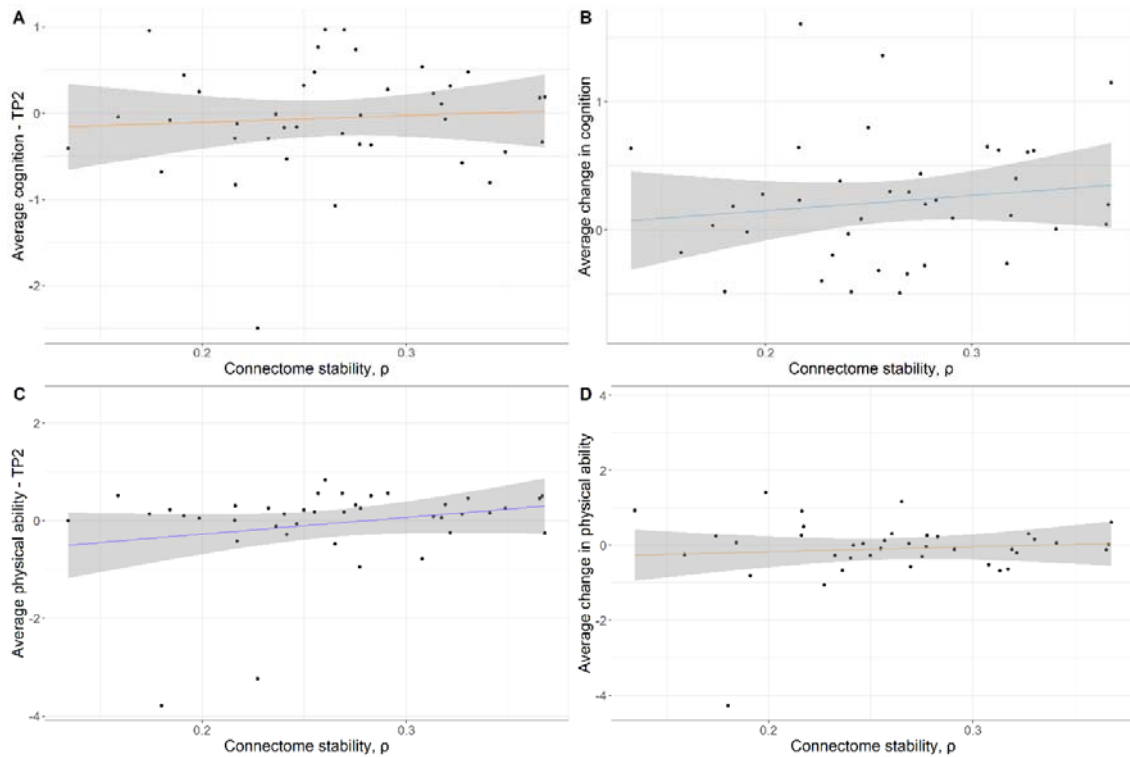

323  
324 **Figure 5** Effect of FC reorganization on cognitive performance and physical ability. (A) Effect of FC  
325 reorganization on average cognition at follow-up,  $\beta = 1.98$ ,  $t(34) = 1.20$ ,  $p = .27$ . (B) Effect of FC  
326 reorganization on average change in cognition,  $\beta = 1.00$ ,  $t(33) = 0.64$ ,  $p = .52$ . (C) Effect of FC  
327 reorganization on physical ability at follow-up,  $\beta = 4.56$ ,  $t(34) = 2.00$ ,  $p = .05$ . (D) Effect of FC  
328 reorganization on average change in physical ability,  $\beta = 0.89$ ,  $t(33) = 0.33$ ,  $p = .75$ .

329

330 **DISCUSSION**

331 In this study, we investigated clinical relevance of connectome stability as an individual-level global  
332 marker of longitudinal FC changes, in a five years longitudinal prospective study of patients recently  
333 diagnosed with MS. In addition, we performed a cross-sectional case-control comparison with a  
334 matched group of healthy controls, assessing network- and edgewise FC differences between MS  
335 patients and controls.

336 The case-control comparison replicated previous reports of bi-directional FC differences in  
337 MS compared to a matched HC sample<sup>11, 40</sup>, supporting our first hypothesis that FC aberrations are  
338 present already in the early stages of MS.

339 Schoonheim et al. (2010) have proposed a model for functional reorganization of the brain  
340 in relation to structural damage and clinical impairment in MS<sup>41</sup>, postulating that, at least in the early  
341 stages of MS, functional connectivity would increase as a mechanism to suspend the effects of  
342 microstructural damage occurring in the brain as a compensatory mechanism to delay clinical  
343 disability. Since then, accumulating evidence has established that FC aberrations are in fact  
344 bidirectional in MS<sup>11</sup>, and the authors recognized the first model postulated was overly simplified<sup>13</sup>.  
345 Although their intuition and conceptualization of the model for FC reorganization following disease  
346 progression in MS was valid, we hypothesize that their measure for FC reorganization was  
347 incomplete.

348 In this study, we present a novel approach enabling us to study individual longitudinal FC  
349 reorganization in relation to disease progression in MS. Investigating the longitudinal stability of the  
350 brain functional connectome allows us to study the complex dynamics of FC reorganization in MS,  
351 finally enabling us to test the model presented by Schoonheim et al.<sup>41</sup>, considering not only the  
352 increase in FC, but the whole complex interplay of FC changes following structural damage in MS.

353 In accordance with our hypothesis that disease progression in MS was associated with FC  
354 reorganization as measured by connectome stability, we found that FC changed at a higher rate as  
355 brain atrophy, but not lesion volume, increased. In line with the same hypothesis, we expected to

356 see increased FC reorganization in patients experiencing disease activity between baseline and  
357 follow-up. Connectome stability in network (2) was lower in EDA patients compared to NEDA  
358 patients, however the observed difference between these two sub-groups did not remain significant  
359 after correcting for multiple testing.

360 Finally, we assessed the clinical relevance of the connectome stability measure in our  
361 sample. We did not observe significant associations between connectome stability and progression  
362 of cognitive and physical impairment. A possible reason might be that our MS cohort was  
363 remarkably stable in the follow-up period, exemplified by observations that only two participants  
364 displayed a significant decrease (defined as an annual reduction of > 0.25 SD in the five years follow-  
365 up period) in physical ability, and none in average cognition ([figure e-5 and e-6 in Supplemental data](#)  
366 [respectively](#)). Lower connectome stability was associated with lower physical ability at follow-up, but  
367 the result was likely to be driven by two outliers performing very poorly at follow-up. We did not  
368 detect any association between FC reorganization and average cognition at follow-up. According to  
369 the model presented by Schoonheim et al<sup>41</sup>, FC reorganization delays the onset of clinical  
370 impairment. Since we did not detect any worsening in the clinical performance of our MS patients  
371 during the observed period of time, it is tempting to speculate whether the FC changes, that  
372 occurred, delayed the onset of impairment. Therefore, it will be important to repeat these analyses  
373 in a planned follow-up of the group of patients in a few years.

374 Using connectome stability as an individual-level longitudinal measure, by incorporating the  
375 global dynamics of FC changes in the brain, has previously been used to study mental health in  
376 adolescent neurodevelopment<sup>42</sup> as well as severe mental disorders<sup>14</sup>, but has so far remained  
377 unexplored in MS. The measure is based on longitudinal within-subjects Spearman correlation  
378 coefficients<sup>14, 42</sup>. Any change in FC that occurs over time, independent of the direction, will cause a  
379 shift in ranks that lowers the Spearman correlation coefficient, thus providing a global measure  
380 sensitive to relative FC reorganization. However, the shift in ranks of one connection causes the

381 following shift in ranks of all the others, potentially inflating the measure of connectome stability.  
382 We correlated the index of connectome stability with the sum of the squared differences in FC to  
383 control for possible artefacts due to the implementation of a rank-based measure. Since the  
384 correlation is strong, highly significant and goes in the expected direction we are confident that  
385 connectome stability is a valid approach to investigate FC reorganization in MS.

386 Our study is, to our knowledge, one of very few published studies investigating longitudinal  
387 FC in MS<sup>40, 43</sup>. In general, our results reproduced and confirmed the results reported by Rocca et al  
388 and Koubiyr et al. (2019) investigating clinically isolated syndrome (CIS) patients in a longitudinal  
389 setting<sup>40, 43</sup>. All these studies show FC abnormalities at the early phases of the disease and, in line  
390 with Rocca et al. we found that FC alterations do not correlate with lesion volume. Furthermore,  
391 even though the main approach to study FC reorganization is different in these studies, all data-sets  
392 suggest brain reorganization during disease progression.

393 A limitation of our study is that we could not investigate the difference in connectome  
394 stability between HCs and MS patients due to the lack of MRI at follow-up for HCs. Since HCs  
395 performed cognitive tests only at baseline, we used the results of HCs at baseline to create the Z-  
396 scores for MS patients at follow-up. Z-scores for physical ability were based on analyses of  
397 performance of MS patients only. Practice effects in cognitive tests seem to have occurred, but we  
398 could not account for them, for example calculating the reliable change index as done by Eijlers et  
399 al.<sup>22</sup>. The sample size of our MS cohort is comparable with that of previous studies investigating FC  
400 longitudinally<sup>40</sup>. In sub-group analyses the sample sizes are modest. Finally, functional connections  
401 of the brain are known to be dynamic, and future studies with longer scan duration may be able to  
402 pursue approaches for assessing the dynamic aspects of the FC in the brains of patients with MS.

403 To conclude, in this longitudinal study we found that our MS cohort was remarkably clinically  
404 stable. Only two patients showed a significant decrease in physical ability and cognitive performance  
405 was preserved in all participants in the follow-up period. We found that FC abnormalities are

406 bidirectional and occur already at the early stages of MS. We used the stability of the brain  
407 functional connectome as a proxy for FC reorganization, enabling us to study FC changes in relation  
408 to disease progression. We found that FC reorganization and brain atrophy advance in parallel. In  
409 future studies, the MS cohort needs to be followed up again to enable further analyses of functional  
410 brain changes and clinical course. Connectome stability enables fMRI data to be condensed into a  
411 proxy as an individual marker of brain health in a personalized medical approach to complement the  
412 existing biomarkers in MS<sup>44</sup>.

413

#### 414 **Acknowledgement**

415 We thank all patients participating in our studies. We acknowledge the collaboration with members  
416 of the Multiple Sclerosis Research Group and NORMENT at the University of Oslo and Oslo University  
417 hospital, especially Elisabeth G. Celius for her guidance during the investigations of the MS patients  
418 and Tobias Kaufmann for valuable help and input on the statistical approach. We also thank the  
419 research assistants Kristin Liltved Grønsberg, May-Britt Gjengstø Utheim, Julia Timofeeva, Hedda  
420 Maurud, Siren Tønnessen and Petter Espeseth Emhjellen who all contributed in the cognitive testing  
421 of the patients.

422

#### 423 **Study funding**

424 The project was supported by grants from the South-Eastern Health Authorities of Norway (grant  
425 number 2011059/ES563338/Biotek 2021) and by the European Union under the Horizon 2020  
426 programme (grant number 733161).

427

#### 428 **Disclosures**

429 E. A. Høgestøl has received honoraria for lecturing from Biogen, Merck and Sanofi-Genzyme, and  
430 unrestricted research support from Merck and Sanofi-Genzyme. P. Sowa has received honoraria for  
431 lecturing and travel support from Merck. M. K. Beyer has received honoraria for lecturing from  
432 Novartis and Biogen Idec. H.F Harbo has received travel support, honoraria for advice or lecturing  
433 from Biogen Idec, Sanofi-Genzyme, Merck, Novartis, Roche, and Teva and an unrestricted research  
434 grant from Novartis. Hanneke Hulst received honoraria for speaking at scientific meetings, serving at  
435 scientific advisory boards and consulting activities from Biogen, Celgene, Genzyme, Merck and  
436 Roche. She has received research support from the Dutch MS Research foundation and serves on the  
437 editorial board of Multiple Sclerosis Journal (MSJ). S. Ghezzi, G.O. Nygaard, T. Espeseth, L.T. Westlye  
438 and D. Alnæs report no disclosures.

#### 439 **Appendix**

#### 440 Authors

| <b>Name</b>                  | <b>Location</b>                               | <b>Contribution</b>                                                                                                                                                           |
|------------------------------|-----------------------------------------------|-------------------------------------------------------------------------------------------------------------------------------------------------------------------------------|
| <b>Einar A. Høgestøl, MD</b> | Oslo University Hospital & University of Oslo | Conceived the study, data collection conception and design of the work, data analysis and interpretation, drafting the article, final approval of the version to be published |
| <b>Samuele Ghezzi, BSc</b>   | Oslo University Hospital & University of Oslo | Data analysis and interpretation, drafting the article, final approval of the version to be published                                                                         |
| <b>Gro O. Nygaard, PhD</b>   | Oslo University Hospital                      | Conceived the study, data collection conception and design of the work, final approval of the version to be published                                                         |
| <b>Thomas Espeseth, PhD</b>  | University of Oslo & Bjørknes College         | Data collection, final approval of the version to be published                                                                                                                |
| <b>Piotr Sowa, MD, PhD</b>   | Oslo University Hospital                      | Data collection, final approval of the version to be published                                                                                                                |
| <b>Mona K. Beyer, PhD</b>    | Oslo University Hospital & University of Oslo | Data collection and design of the work, final approval of the version to be published                                                                                         |
| <b>Hanne F. Harbo, PhD</b>   | Oslo University Hospital & University of Oslo | Conceived the study, data collection, conception and design of the work, final approval of the version to be published                                                        |
| <b>Lars T. Westlye, PhD</b>  | Oslo University Hospital & University of Oslo | Data analysis and interpretation, final approval of the version to be published                                                                                               |

---

|                              |                                                  |                                                                                                             |
|------------------------------|--------------------------------------------------|-------------------------------------------------------------------------------------------------------------|
|                              |                                                  | published                                                                                                   |
| <b>Hanneke E. Hulst, PhD</b> | Amsterdam UMC & Vrije<br>Universiteit Amsterdam  | Data analysis and interpretation,<br>drafting the article, final approval<br>of the version to be published |
| <b>Dag Alnæs, PhD</b>        | Oslo University Hospital &<br>University of Oslo | Data analysis and interpretation,<br>drafting the article, final approval<br>of the version to be published |

---

441

442 **REFERENCES**

- 443 1. Barkhof F. The clinico-radiological paradox in multiple sclerosis revisited. *Current opinion in*  
444 *neurology* 2002;15:239-245.
- 445 2. Chard D, Trip SA. Resolving the clinico-radiological paradox in multiple sclerosis. *F1000Res*  
446 2017;6:1828.
- 447 3. Peer M, Nitzan M, Bick AS, Levin N, Arzy S. Evidence for Functional Networks within the  
448 Human Brain's White Matter. *J Neurosci* 2017;37:6394-6407.
- 449 4. Smith SM, Fox PT, Miller KL, et al. Correspondence of the brain's functional architecture  
450 during activation and rest. *Proceedings of the National Academy of Sciences of the United States of*  
451 *America* 2009;106:13040-13045.
- 452 5. Basile B, Castelli M, Monteleone F, et al. Functional connectivity changes within specific  
453 networks parallel the clinical evolution of multiple sclerosis. *Multiple sclerosis (Houndmills,*  
454 *Basingstoke, England)* 2014;20:1050-1057.
- 455 6. Rocca MA, Valsasina P, Martinelli V, et al. Large-scale neuronal network dysfunction in  
456 relapsing-remitting multiple sclerosis. *Neurology* 2012;79:1449-1457.
- 457 7. d'Ambrosio A, Valsasina P, Gallo A, et al. Reduced dynamics of functional connectivity and  
458 cognitive impairment in multiple sclerosis. *Multiple sclerosis (Houndmills, Basingstoke, England)*  
459 2019:1352458519837707.
- 460 8. Rocca MA, Valsasina P, Leavitt VM, et al. Functional network connectivity abnormalities in  
461 multiple sclerosis: Correlations with disability and cognitive impairment. *Multiple sclerosis*  
462 *(Houndmills, Basingstoke, England)* 2018;24:459-471.
- 463 9. Havelle DJ, Hipp JF, Lewis CM, Corbetta M, Engel AK. Increased functional connectivity  
464 indicates the severity of cognitive impairment in multiple sclerosis. *Proceedings of the National*  
465 *Academy of Sciences of the United States of America* 2011;108:19066-19071.
- 466 10. Rocca MA, Valsasina P, Absinta M, et al. Default-mode network dysfunction and cognitive  
467 impairment in progressive MS. *Neurology* 2010;74:1252-1259.
- 468 11. Tahedl M, Levine SM, Greenlee MW, Weissert R, Schwarzbach JV. Functional Connectivity in  
469 Multiple Sclerosis: Recent Findings and Future Directions. *Frontiers in neurology* 2018;9:828.
- 470 12. Faivre A, Rico A, Zaaraoui W, et al. Assessing brain connectivity at rest is clinically relevant in  
471 early multiple sclerosis. *Multiple sclerosis (Houndmills, Basingstoke, England)* 2012;18:1251-1258.
- 472 13. Schoonheim MM, Meijer KA, Geurts JJ. Network collapse and cognitive impairment in  
473 multiple sclerosis. *Frontiers in neurology* 2015;6:82.
- 474 14. Kaufmann T, Alnaes D, Brandt CL, et al. Stability of the Brain Functional Connectome  
475 Fingerprint in Individuals With Schizophrenia. *JAMA psychiatry* 2018;75:749-751.
- 476 15. Nygaard GO, Walhovd KB, Sowa P, et al. Cortical thickness and surface area relate to specific  
477 symptoms in early relapsing-remitting multiple sclerosis. *Multiple sclerosis (Houndmills, Basingstoke,*  
478 *England)* 2015;21:402-414.
- 479 16. Nygaard GO, Celius EG, de Rodez Benavent SA, et al. A Longitudinal Study of Disability,  
480 Cognition and Gray Matter Atrophy in Early Multiple Sclerosis Patients According to Evidence of  
481 Disease Activity. *PloS one* 2015;10:e0135974.

- 482 17. Høgestøl EA, Kaufmann T, Nygaard GO, et al. Cross-Sectional and Longitudinal MRI Brain  
483 Scans Reveal Accelerated Brain Aging in Multiple Sclerosis. *Frontiers in neurology* 2019;10.
- 484 18. Polman CH, Reingold SC, Banwell B, et al. Diagnostic criteria for multiple sclerosis: 2010  
485 revisions to the McDonald criteria. *Annals of neurology* 2011;69:292-302.
- 486 19. Espeseth T, Christoforou A, Lundervold AJ, Steen VM, Le Hellard S, Reinvang I. Imaging and  
487 cognitive genetics: the Norwegian Cognitive NeuroGenetics sample. *Twin Res Hum Genet*  
488 2012;15:442-452.
- 489 20. Krupp LB, LaRocca NG, Muir-Nash J, Steinberg AD. The fatigue severity scale. Application to  
490 patients with multiple sclerosis and systemic lupus erythematosus. *Archives of neurology*  
491 1989;46:1121-1123.
- 492 21. Penner IK, Paul F. Fatigue as a symptom or comorbidity of neurological diseases. *Nature*  
493 *reviews Neurology* 2017.
- 494 22. Eijlers AJC, van Geest Q, Dekker I, et al. Predicting cognitive decline in multiple sclerosis: a 5-  
495 year follow-up study. *Brain : a journal of neurology* 2018;141:2605-2618.
- 496 23. Dale AM, Fischl B, Sereno MI. Cortical surface-based analysis. I. Segmentation and surface  
497 reconstruction. *NeuroImage* 1999;9:179-194.
- 498 24. Reuter M, Schmansky NJ, Rosas HD, Fischl B. Within-subject template estimation for  
499 unbiased longitudinal image analysis. *NeuroImage* 2012;61:1402-1418.
- 500 25. Brewer JB. Fully-automated volumetric MRI with normative ranges: translation to clinical  
501 practice. *Behav Neurol* 2009;21:21-28.
- 502 26. W. Luo KL, A. M. Ulug, J. Albright, S. Magda, R. Haxton, C. Airriess. LesionQuant Performance  
503 Evaluation
- 504 Accuracy and Reproducibility (white paper): Cortechs Labs, 2017.
- 505 27. Damangir S, Manzouri A, Oppedal K, et al. Multispectral MRI segmentation of age related  
506 white matter changes using a cascade of support vector machines. *Journal of the neurological*  
507 *sciences* 2012;322:211-216.
- 508 28. Smith SM, Jenkinson M, Woolrich MW, et al. Advances in functional and structural MR image  
509 analysis and implementation as FSL. *NeuroImage* 2004;23 Suppl 1:S208-219.
- 510 29. Jenkinson M, Bannister P, Brady M, Smith S. Improved optimization for the robust and  
511 accurate linear registration and motion correction of brain images. *NeuroImage* 2002;17:825-841.
- 512 30. Smith SM. Fast robust automated brain extraction. *Human brain mapping* 2002;17:143-155.
- 513 31. Smith SM, Brady JM. SUSAN—A New Approach to Low Level Image Processing. *International*  
514 *Journal of Computer Vision* 1997;23:45-78.
- 515 32. Beckmann CF, DeLuca M, Devlin JT, Smith SM. Investigations into resting-state connectivity  
516 using independent component analysis. *Philosophical transactions of the Royal Society of London*  
517 *Series B, Biological sciences* 2005;360:1001-1013.
- 518 33. Griffanti L, Salimi-Khorshidi G, Beckmann CF, et al. ICA-based artefact removal and  
519 accelerated fMRI acquisition for improved resting state network imaging. *NeuroImage* 2014;95:232-  
520 247.
- 521 34. Pruim RH, Mennes M, van Rooij D, Llera A, Buitelaar JK, Beckmann CF. ICA-AROMA: A robust  
522 ICA-based strategy for removing motion artifacts from fMRI data. *NeuroImage* 2015;112:267-277.
- 523 35. Nickerson LD, Smith SM, Ongur D, Beckmann CF. Using Dual Regression to Investigate  
524 Network Shape and Amplitude in Functional Connectivity Analyses. *Front Neurosci* 2017;11:115.
- 525 36. Ledoit O, Wolf M. Improved estimation of the covariance matrix of stock returns with an  
526 application to portfolio selection. *Journal of Empirical Finance* 2003;10:603-621.
- 527 37. Brier MR, Mitra A, McCarthy JE, Ances BM, Snyder AZ. Partial covariance based functional  
528 connectivity computation using Ledoit-Wolf covariance regularization. *NeuroImage* 2015;121:29-38.
- 529 38. R: A Language and Environment for Statistical Computing [computer program]. Vienna,  
530 Austria: R Foundation for Statistical Computing, 2017.
- 531 39. Singh KD, Barnes GR, Hillebrand A. Group imaging of task-related changes in cortical  
532 synchronisation using nonparametric permutation testing. *NeuroImage* 2003;19:1589-1601.



- 533 40. Rocca MA, Hidalgo de La Cruz M, Valsasina P, et al. Two-year dynamic functional network  
534 connectivity in clinically isolated syndrome. Multiple sclerosis (Houndmills, Basingstoke, England)  
535 2019;1352458519837704.
- 536 41. Schoonheim MM, Geurts JJ, Barkhof F. The limits of functional reorganization in multiple  
537 sclerosis. Neurology 2010;74:1246-1247.
- 538 42. Kaufmann T, Alnaes D, Doan NT, Brandt CL, Andreassen OA, Westlye LT. Delayed  
539 stabilization and individualization in connectome development are related to psychiatric disorders.  
540 Nature neuroscience 2017.
- 541 43. Koubiyr I, Besson P, Deloire M, et al. Dynamic modular-level alterations of structural-  
542 functional coupling in clinically isolated syndrome. Brain : a journal of neurology 2019;142:3428-  
543 3439.
- 544 44. Giovannoni G, Butzkueven H, Dhib-Jalbut S, et al. Brain health: time matters in multiple  
545 sclerosis. Multiple sclerosis and related disorders 2016;9 Suppl 1:S5-S48.
- 546
